# Supplementary material
Source: ML conference proceedings conference paper supplement (https://openaccess.thecvf.com/content/cvpr_2015/html/Oh_Fast_Randomized_Singular_2015_CVPR_paper.html)
Supplement: Supplementary file 1 [file Supple.pdf › Supple.pdf]

# Supplementary Material: Fast Randomized Singular Value Thresholding for Nuclear Norm Minimization

Tae-Hyun Oh  
KAIST  
thoh.kaist.ac.kr  
@gmail.com

Yasuyuki Matsushita  
Microsoft Research Asia  
/ Osaka University  
yasumat@ist.osaka-u.ac.jp

Yu-Wing Tai  
KAIST  
yuwing@gmail.com

In So Kweon  
KAIST  
iskweon77  
@kaist.ac.kr

## Supplementary Material

In this supplementary material, we prove Proposition 1 in detail. In addition, we present additional experimental results of synthetic dataset and real-world applications that do not appear in the main paper due to space limitation. Movie clips for weather artifact removal and face stabilization are provided in the multimedia supplementary material. All the parameters specifically not mentioned here in this material are same with in the main paper or the referred papers.

### 1. Summary of Notations

|                           |                                                                                                                                                  |
|---------------------------|--------------------------------------------------------------------------------------------------------------------------------------------------|
| $\pi_\Psi(\cdot)$         | Orthogonal projection operator with a map (index set) $\Psi$                                                                                     |
| $\mathbb{S}_\tau(\cdot)$  | SVT operator with the parameter $\tau$                                                                                                           |
| $\mathcal{S}_\tau(\cdot)$ | Soft shrinkage operator [10] with the parameter $\tau$                                                                                           |
| $\sigma_i(\cdot)$         | $i$ -th singular value of a matrix                                                                                                               |
| $\mathbf{\Omega}$         | A standard Gaussian random matrix                                                                                                                |
| $\mathbf{Q}$              | Orthonormal column matrix                                                                                                                        |
| $\mathbf{O}$              | Observation matrix (Input)                                                                                                                       |
| $\mathbf{L}, \mathcal{L}$ | Low-rank optimization related matrix or tensor                                                                                                   |
| $\mathbf{S}, \mathcal{E}$ | Sparse optimization related matrix or tensor                                                                                                     |
| $k$                       | Parameter for the target rank                                                                                                                    |
| $p$                       | Parameter for over-sampling rate                                                                                                                 |
| $l$                       | Sampling (predicted) rate ( $l = k + p$ )                                                                                                        |
| $r$                       | True rank of the target matrix $\mathbf{A}$                                                                                                      |
| $s$                       | Real sampling rate ( $s = \min(l, r)$ )                                                                                                          |
| $\eta$                    | Number of the power iteration                                                                                                                    |
| $b$                       | Parameter for the maximum rank bound                                                                                                             |
| $\mathbf{v}$              | Parameter vector for the polynomial error bound ( $\mathbf{v} = \{k, p\}$ without the power iteration, or $\mathbf{v} = \{k, p, \eta\}$ with it) |

### 2. Proof of Proposition 1.

**Proposition 1.** Let  $\mathbf{A} = \mathbf{Q}\mathbf{B} \in \mathbb{R}^{m \times n}$ , where  $\mathbf{Q} \in \mathbb{R}^{m \times n}$  has orthonormal columns. Then, the following equality holds:

$$\mathbb{S}_\tau(\mathbf{A}) = \mathbf{Q} \mathbb{S}_\tau(\mathbf{B}),$$

where  $\mathbb{S}_\tau(\cdot)$  is the SVT operator.

*Proof.* When  $m = n$  and  $\mathbf{Q}$  is an orthonormal matrix, the equality obviously holds by unitary invariant property of norms.

For  $m > n$ , we prove the equality for the orthonormal column matrix. Consider an arbitrary matrix  $\mathbf{Z} = \mathbf{U}_Z \Sigma_Z \mathbf{V}_Z^\top \in \mathbb{R}^{n \times n}$ , where  $\mathbf{U}_Z \Sigma_Z \mathbf{V}_Z^\top$  is its SVD, then

$$\begin{aligned}
\mathbf{Q} \cdot \mathbb{S}_\tau(\mathbf{B}) &= \mathbf{Q} \cdot \operatorname{argmin}_{\mathbf{Z}} \left( \tau \|\mathbf{Z}\|_* + \frac{1}{2} \|\mathbf{Z} - \mathbf{B}\|_F^2 \right) \\
&= \operatorname{argmin}_{\mathbf{QZ}=\mathbf{X}} \left( \tau \|\mathbf{Z}\|_* + \frac{1}{2} \|\mathbf{Z} - \mathbf{B}\|_F^2 \right) \\
&= \operatorname{argmin}_{\mathbf{X}} \tau \|\mathbf{Q}^\top \mathbf{X}\|_* + \frac{1}{2} \|\mathbf{Q}(\mathbf{Z} - \mathbf{B})\|_F^2 \\
&\quad (\text{since } \mathbf{Q}^\top \mathbf{Q} = \mathbf{I}, \text{ and the unitary invariant norm property}) \\
&= \operatorname{argmin}_{\mathbf{X}} \tau \|\mathbf{X}\|_* + \frac{1}{2} \|\mathbf{X} - \mathbf{QB}\|_F^2 \\
&\quad (\text{since } \|\mathbf{Q}^\top \mathbf{X}\|_* = \|\mathbf{Z}\|_* = \|\mathbf{QZ}\|_* = \|\mathbf{X}\|_*) \\
&= \mathbb{S}_\tau(\mathbf{QB}) = \mathbb{S}_\tau(\mathbf{A}).
\end{aligned}$$

□

### 3. Experiment with Synthetic Data

The following lists comparison methods. All the parallelization techniques are not used and turned off for the fair comparison.

|                             |                                                                                                                                                                                                                       |
|-----------------------------|-----------------------------------------------------------------------------------------------------------------------------------------------------------------------------------------------------------------------|
| SVD <sub>Matlab 2010a</sub> | Built-in SVD(·, 'econ') is based on Intel MKL 10.2.2 and LAPACK 3.2.1.                                                                                                                                                |
| SVD <sub>Matlab 2014a</sub> | Built-in SVD(·, 'econ') is based on LAPACK 3.4.1 in Intel MKL 11.0.5.                                                                                                                                                 |
| LTSVD*                      | The Matlab implementation by Ma <i>et al.</i> [25] is used.                                                                                                                                                           |
| Lanczos                     | The implementation optimized by Lin <i>et al.</i> [16] is used. It is implemented by Matlab and Mex to use LAPACK (ver. 3.4.1 in Intel MKL 11.0.5 is used).                                                           |
| BLWS                        | The Matlab implementation by Lin <i>et al.</i> [19] is used.                                                                                                                                                          |
| Mu <i>et al.</i>            | The Matlab implementation provided by Mu <i>et al.</i> [26] is used. All the parameters is directly used as suggested.                                                                                                |
| FSVT ***                    | We implement FSVT by Matlab and Mex based on Intel MKL 11.0.5, and the speed-up gain is checked and consistent with the reported results in Cai <i>et al.</i> [2]. All the parameters are directly used as suggested. |
| RSVD ***                    | We implement RSVD [11] based on LAPACK 3.4.1 in Intel MKL 11.0.5. by referring to RedSVD**.                                                                                                                           |
| FRSVT ***                   | Our Matlab implementation based on Intel MKL 11.0.5. Partially, we implement Mex functions for QR-CP (dgeqp3) and Polar Decomposition with BLAS and LAPACK 3.4.1 routines.                                            |

\* LTSVD: In the implementation of [25], the leverage score estimation suggested by the original paper [5] is omitted, which is required for the importance sampling. So we implement it with  $O(mn)$  complexity.

\*\* RedSVD (<http://code.google.com/p/redsvd/>): Since RedSVD is implemented based on Eigen 3.0-b1, without the power iteration, so the original implementation is not fast and inaccurate. Thus, we re-implement RSVD [11] by just referring to RedSVD (2-sides random projection).

\*\*\* For FSVT, RSVD and FRFSVT implementation, we utilize Armadillo library [33] as a high level wrapper for LAPACK and BLAS of Intel MKL in our Mex implementation part. In the Mex functions of Lanczos, Lin *et al.* [16] directly call LAPACK routines without any external library.

### 3.1. Single SVT test

The comparisons are shown in Figs. 5 and 6.

#### Parameters for Single SVT test

- Gaussian random matrix: drawn from  $N(0, 1)$ .
- $\tau = 1/\sqrt{\|\mathbf{A}\|_2}$ .
- The number of repeats: 3 times.
- Over-sampling rate  $p$ :

|       | Lanczos | LTSVD | FRSVT |
|-------|---------|-------|-------|
| ' $p$ | 2       | $2k$  | 5     |

- Power iteration  $q = 2$ .

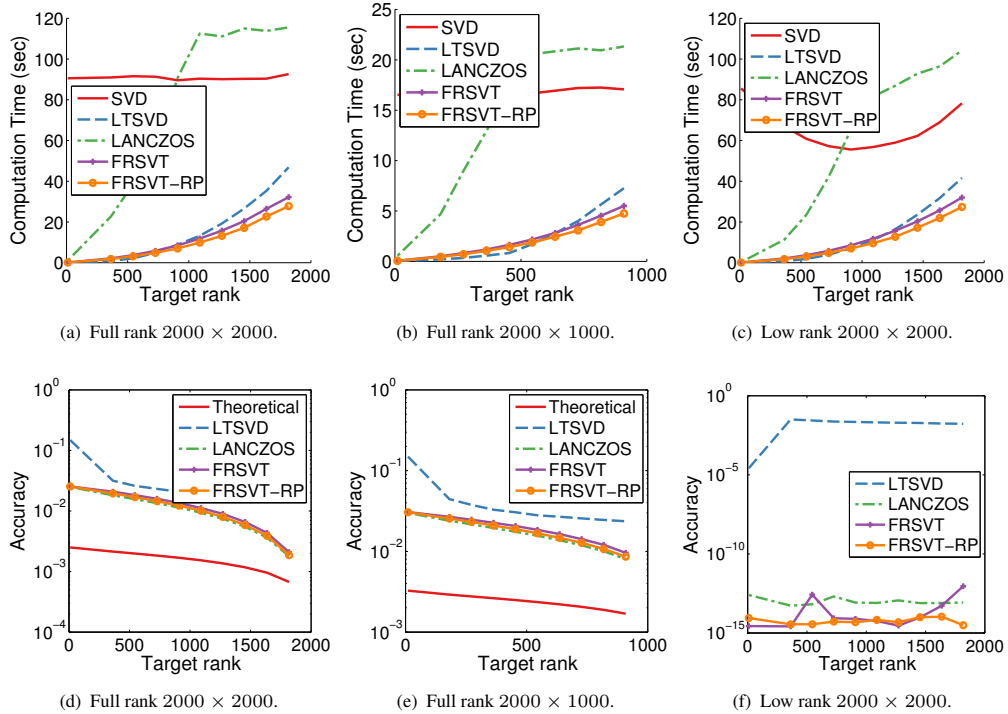

Figure 5. SVT comparisons according to SVDs on Matlab 2010a. [Top] X-axis: Target rank, Y-axis: Elapsed time (Sec). [Bottom] X-axis: Target rank, Y-axis:  $\|\mathbf{A}^* - \hat{\mathbf{A}}_k\|_F / \|\mathbf{A}^*\|_F$ , where  $\mathbf{A}^* = \mathbb{S}_\tau(\mathbf{D}_{GT})$ ,  $\hat{\mathbf{A}}_k = \mathbb{S}_\tau(\mathbf{D}_k)$ ,  $\mathbf{D}_{GT}$  is the input data, and  $\mathbf{D}_k$  is approximated by each method. For the low-rank matrix tests, we generate input data matrices of which rank corresponds to the target rank.

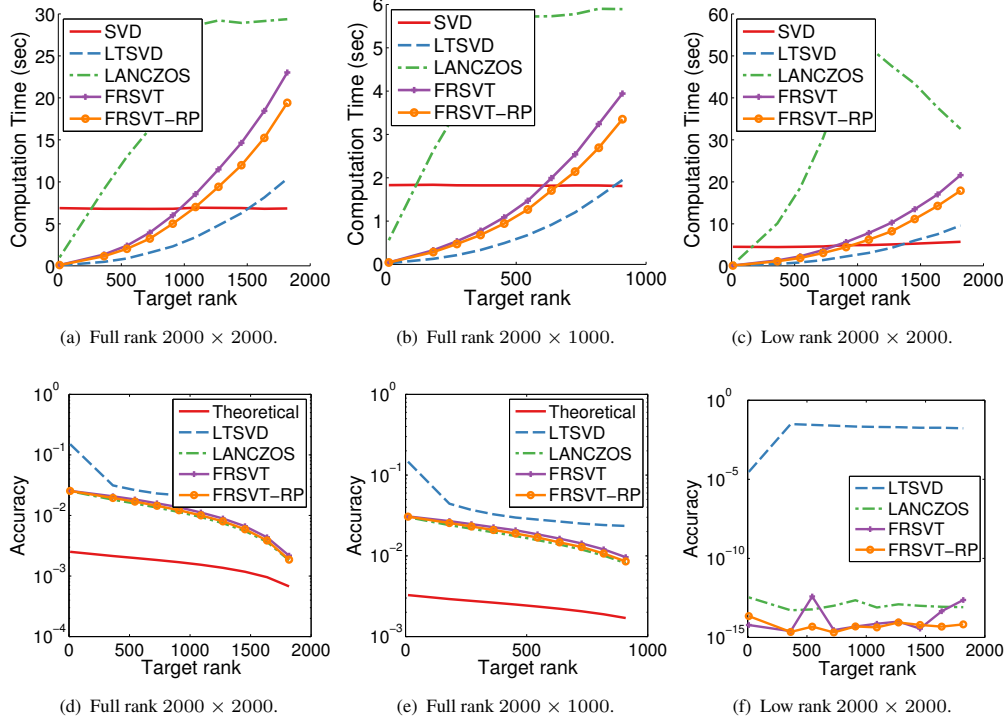

Figure 6. SVT comparisons according to SVDs on Matlab 2014a. [Top] X-axis: Target rank, Y-axis: Elapsed time (Sec). [Bottom] X-axis: Target rank, Y-axis:  $\|\mathbf{A}^* - \hat{\mathbf{A}}_k\|_F / \|\mathbf{A}^*\|_F$ , where  $\mathbf{A}^* = \mathbb{S}_\tau(\mathbf{D}_{GT})$ ,  $\hat{\mathbf{A}}_k = \mathbb{S}_\tau(\mathbf{D}_k)$ ,  $\mathbf{D}_{GT}$  is the input data, and  $\mathbf{D}_k$  is approximated by each method. For the low-rank matrix tests, we generate input data matrices of which rank corresponds to the target rank.

### 3.2. RPCA test

The comparisons on RPCA application are shown in Figs. 7, 8 and 9.

#### Parameters for RPCA test

$$-\lambda = \frac{1}{\sqrt{\max(m, n)}}$$

– All other parameters for FRSVT are same as mentioned in Sec. 3 and with the below table.

Table 4. Parameter settings for convergence evaluation of RPCA. ( $p$ : Over-sampling rate, AP: Adaptive rank prediction, PI: The number of power iterations  $\eta$ .)

| Methods                  | $p$ | AP | PI |
|--------------------------|-----|----|----|
| iALM <sub>econSVD</sub>  | –   | ×  | –  |
| iALM <sub>LTSVD</sub>    | +5  | ○  | –  |
| iALM <sub>BLWS</sub>     | –   | ○  | –  |
| Mu <i>et al.</i> [26]    | –   | ×  | –  |
| iALM <sub>FSVT</sub>     | –   | ×  | –  |
| iALM <sub>RSVD</sub>     | +5  | ○  | 2  |
| iALM <sub>FRSVT</sub>    | +2  | ○  | 2  |
| iALM <sub>FRSVT-RP</sub> | +2  | ○  | 2  |

Figure 7. Quantitative comparisons on RPCA application. For Mu *et al.* [26], notice that we use the implementation and parameters provided by the authors. Since Mu *et al.* is based on the exact ALM algorithm [17], while other methods are based on the inexact ALM [17], we report the times for a single outer iteration of Mu *et al.* as ‘Avg. time for a single iteration’. In addition, the highly stochastic property of the randomly projected nuclear norm makes the algorithm [26] very sensitive to data and does not preserve the singular values and sparsity structure of the matrix. This is consistent results with another stochastic method, LTSVD (See and compare  $\|S\|_0$  of LTSVD and Mu *et al.*).

|             | iALM <sub>econSVD</sub>          |              | iALM <sub>LTSVD</sub> | iALM <sub>BLWS</sub> | Mu <i>et al.</i> | iALM <sub>FSVT</sub> | iALM <sub>RSVD</sub> | iALM <sub>FRSVT-RP</sub> |
|-------------|----------------------------------|--------------|-----------------------|----------------------|------------------|----------------------|----------------------|--------------------------|
|             | Matlab 2010a                     | Matlab 2014a |                       |                      |                  |                      |                      |                          |
|             | $\ S\ _0$                        |              |                       |                      |                  |                      |                      |                          |
| 10000 × 100 | 99,999                           |              | 879,415               | 99,999               | 999,999          | 99,999               | 99,999               | 99,999                   |
| 2000 × 2000 | 399,997                          |              | 994,479               | 399,998              | 3,998,401        | 399,997              | 399,997              | 399,997                  |
| 4000 × 4000 | 1,599,981                        |              | 5,607,211             | 1,599,984            | 15,995,318       | 1,599,981            | 1,599,981            | 1,599,981                |
| 6000 × 6000 | –                                | 3,599,952    | 35,662,548            | 3,599,966            | 35,990,553       | 3,599,952            | 3,599,952            | 3,599,952                |
|             | Accuracy                         |              |                       |                      |                  |                      |                      |                          |
| 10000 × 100 | 7.34e-05                         |              | 3.39e-02              | 2.66e-04             | 7.65e-01         | 7.34e-05             | 7.31e-05             | 9.33e-05                 |
| 2000 × 2000 | 2.11e-07                         |              | 7.77e-07              | 1.03e-06             | 1.10e+00         | 2.11e-07             | 2.11e-07             | 2.11e-07                 |
| 4000 × 4000 | 1.81e-07                         |              | 4.59e-07              | 4.83e-07             | 1.37e+00         | 1.81e-07             | 1.81e-07             | 1.81e-07                 |
| 6000 × 6000 | –                                | 1.42e-07     | 7.76e-05              | 3.83e-07             | 1.49e+00         | 1.42e-07             | 1.43e-07             | 1.43e-07                 |
|             | Total Time                       |              |                       |                      |                  |                      |                      |                          |
| 10000 × 100 | 3.217                            | 1.982        | 1.722                 | 1.317                | 125.368          | 2.436                | 0.970                | 0.782                    |
| 2000 × 2000 | 2751.910                         | 147.055      | 11.075                | 9.808                | 118.798          | 348.132              | 12.497               | 5.123                    |
| 4000 × 4000 | 21668.280                        | 1068.863     | 69.547                | 53.468               | 759.794          | 2527.141             | 80.705               | 30.274                   |
| 6000 × 6000 | –                                | 3360.379     | 203.051               | 164.752              | 2385.272         | 8238.109             | 149.204              | 88.132                   |
|             | Avg. time for a single iteration |              |                       |                      |                  |                      |                      |                          |
| 10000 × 100 | 0.140                            | 0.086        | 0.039                 | 0.049                | 1.687            | 0.104                | 0.042                | 0.034                    |
| 2000 × 2000 | 119.415                          | 6.393        | 0.274                 | 0.393                | 1.667            | 15.189               | 0.557                | 0.226                    |
| 4000 × 4000 | 947.908                          | 46.481       | 1.726                 | 2.185                | 10.664           | 110.006              | 3.623                | 1.348                    |
| 6000 × 6000 | –                                | 146.192      | 4.295                 | 6.848                | 33.505           | 358.899              | 6.681                | 3.942                    |
|             | Total no. iteration              |              |                       |                      |                  |                      |                      |                          |
| 10000 × 100 | 23                               |              | 43                    | 24                   | 73               | 23                   | 23                   | 23                       |
| 2000 × 2000 | 23                               |              | 41                    | 24                   | 70               | 23                   | 23                   | 23                       |
| 4000 × 4000 | 23                               |              | 41                    | 24                   | 70               | 23                   | 23                   | 23                       |
| 6000 × 6000 | –                                | 23           | 48                    | 24                   | 70               | 23                   | 23                   | 23                       |

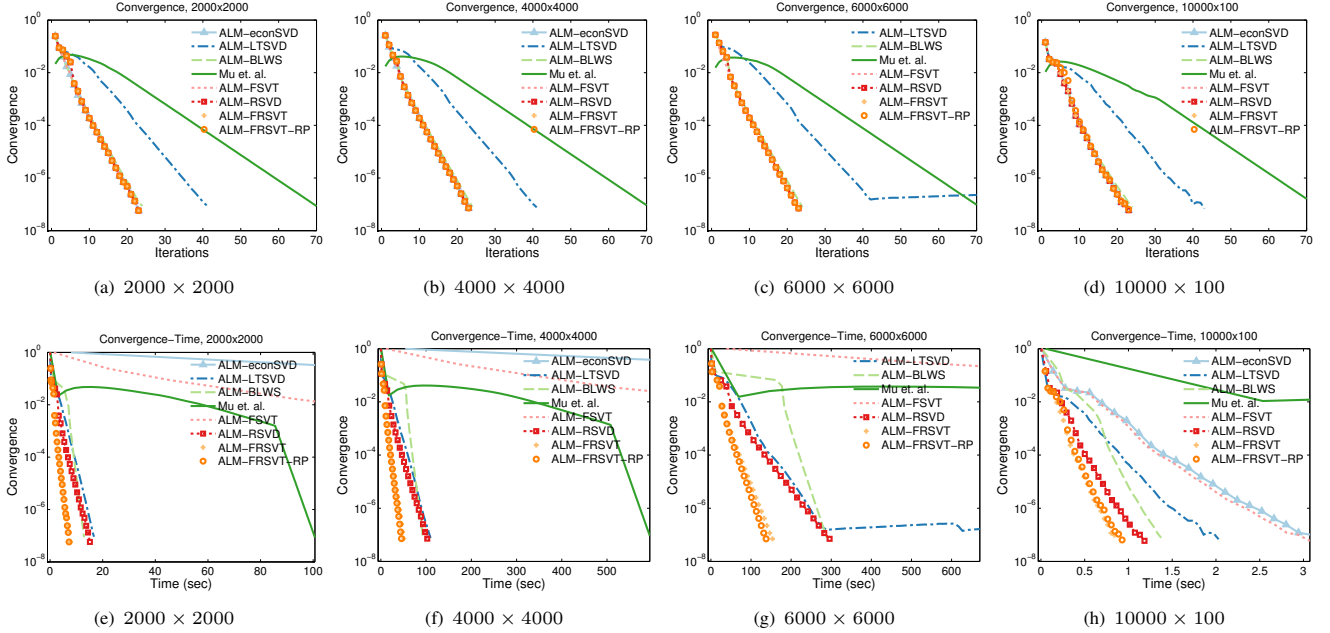

Figure 8. RPCA comparisons on Matlab 2010a. [Top] X-axis: The number of iterations, Y-axis: The stop criterion. [Bottom] X-axis: Elapsed time (Sec), Y-axis: The stop criterion. Except Mu *et al.* is based on the exact ALM method, all the methods are based on the inexact ALM.

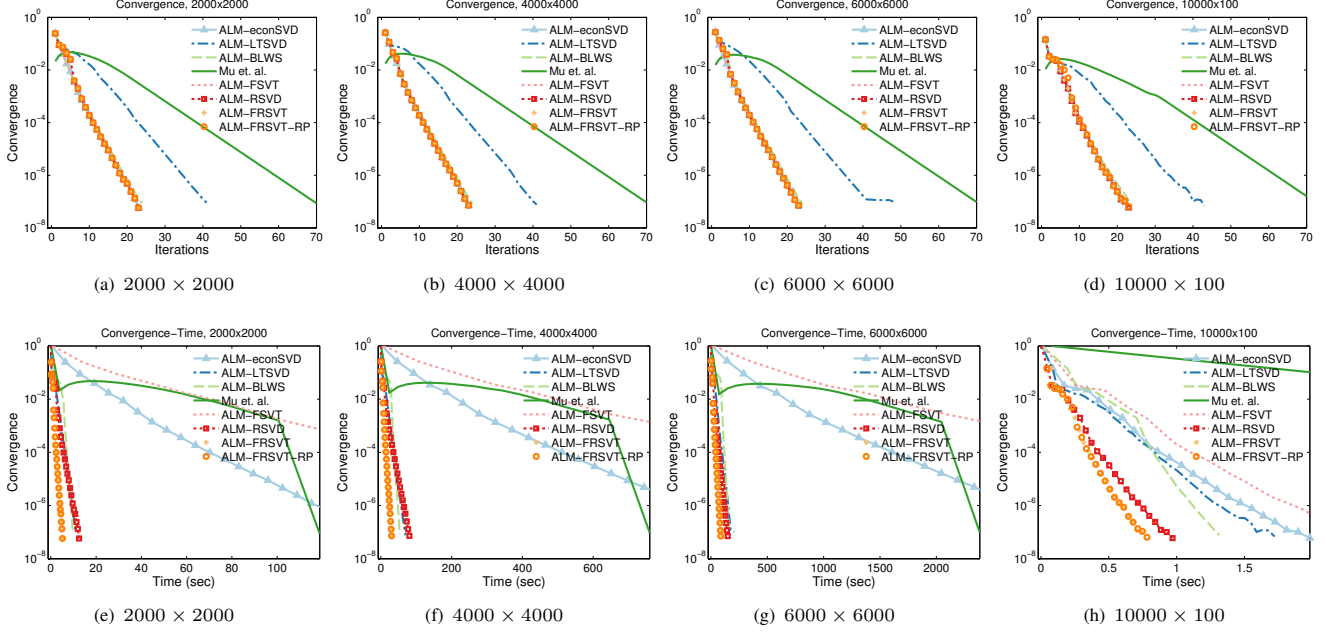

Figure 9. RPCA comparisons on Matlab 2014a. [Left] X-axis: The number of iterations, Y-axis: The stop criterion. [Right] X-axis: Elapsed time (Sec), Y-axis: The stop criterion. Except Mu *et al.* is based on the exact ALM method, all the methods are based on the inexact ALM.

## 4. More Applications

### 4.1. Robust Subspace Clustering by Low-Rank Representation (LRR)

Detailed computation time comparison is shown in Fig. 10.

#### Parameters

- All parameters for FRSVT are same as mentioned in Sec. 3.

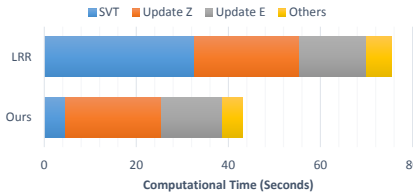

Figure 10. Computation time comparison on the subspace clustering application [20]. Computation times are measured for face clustering on Extended Yale Database B [15].

### 4.2. Semi-Online Weather Artifact Removal

The computation times with different settings of sliding window sizes are shown in Figs. 11, 12 and 13.

#### Parameters

- $\lambda = \frac{1}{\sqrt{\max(m,n)}}$
- Target rank for PSVT: rank-1.
- Max rank- $l$  for computing the partial SVD:
  - $l = 2$ , when  $n = 3$ .
  - $l = 3$ , when  $n = 5, 7$  and  $10$ .
- Power iteration  $q = 2$ .



| Computational Time (ms) |      |      |      |      |
|-------------------------|------|------|------|------|
| Sliding Window $n$      | 3    | 5    | 7    | 10   |
| Elapsed Time            | 71.5 | 65.5 | 68.2 | 66.2 |

Figure 11. Computation times of the FRSVT based semi-online weather artifact removal. The elapsed times are measured for a single color channel. Since our algorithm produces  $n$  results simultaneously for  $n$  images at an execution, we report the time for an single image for a single channel. This results show that, when the number of inputs is small, our weather artifact removal algorithm has linear complexity according to the length of a sliding window, thus the elapsed times for a single image are similar.

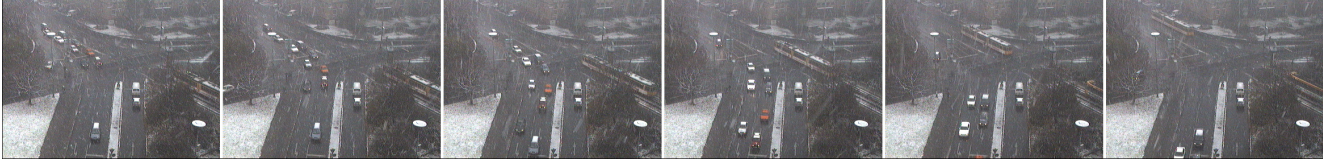

(a) Sampled inputs

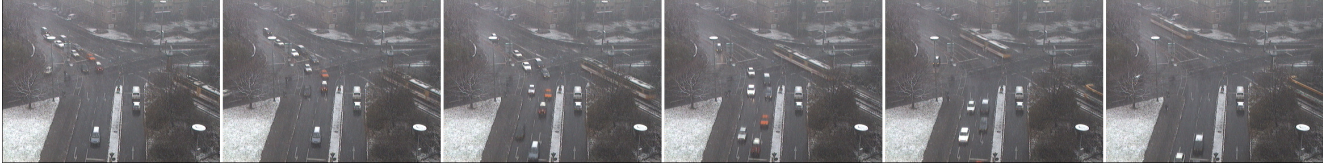

(b) Low-rank images  $\mathbf{L}$  obtained by Oh *et al.* [27] based on SVD

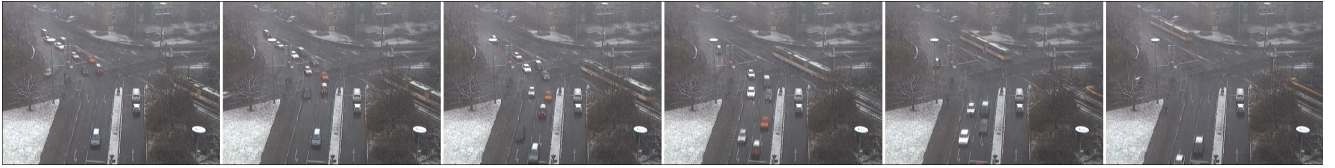

(c) Low-rank images  $\mathbf{L}$  obtained by Oh *et al.* [27] based on our FRSVT

Figure 12. Sampled results for the weather artifact removal with the sliding window length 5.

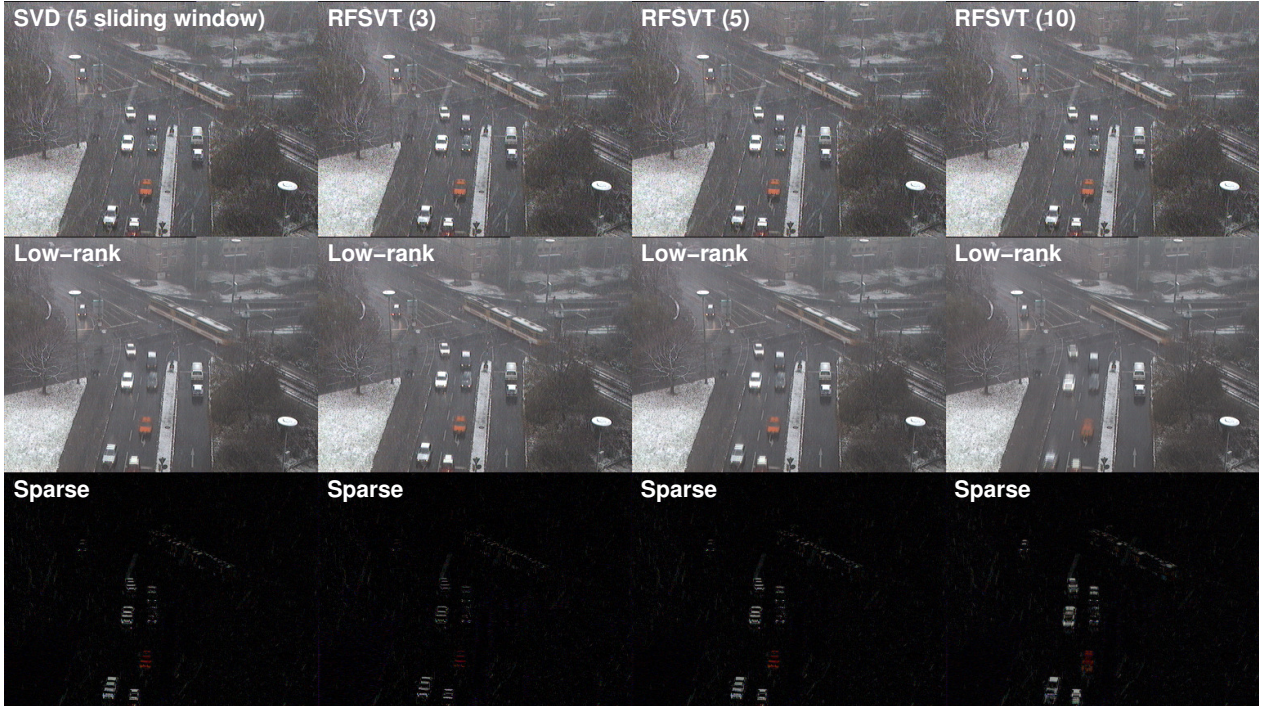

Figure 13. Comparisons according to the sliding window length  $\{3, 5, 10\}$ . [Top] Input images. [Middle] Low-rank images,  $\mathbf{L}$ . [Bottom] Absolute of sparse images,  $\text{abs}(\mathbf{S})$ .

### 4.3. Simultaneously Alignment and Rectification

The qualitative comparisons are shown in Figs. 14, 15 and 16.

#### Parameters

- $\alpha = [0.1, 0.1, 0.8]$  for *Digits3*, *Windows*, and *Al Gore*.
- $\alpha = [0.15, 0.15, 0.7]$  for *Gait Challenge*.
- $\lambda = \frac{0.5}{\sqrt{\text{width} \cdot \text{height}}}$
- Other parameters for FRSVT are same as mentioned in Sec. 3.

#### Data Generation for Gait Dataset

We use USF Human ID “Gait Challenge” data sets version 1.7. There are 731 gait samples and each sample has 10 sampled gait cycles, and we only use first 300 gait samples. We resize the images into  $32 \times 22$ , so the size of the input tensor is  $\mathcal{O} \in \mathbb{R}^{32 \times 22 \times 3000}$ . The synthetic misalignment generation parameters are described in the below.

Randomly drawn Euclidean (3 DoF) geometric transformations are applied to each gait image. The used parameters are:

- Scale factor: Fixed as 1.
  - Angle noise:  $N(\frac{10\pi}{180}, (\frac{5\pi}{180})^2)$ .
  - Translation noise:  $N(0, 0.5^2) + 2 \cdot (U(0, 1) - 0.5)$ .
- ( $N(\mu, \sigma^2)$  denotes Gaussian distribution with the mean  $\mu$  and the variance  $\sigma^2$ .  $U(a, b)$  denotes Uniform distribution defined on  $[a, b]$ .)

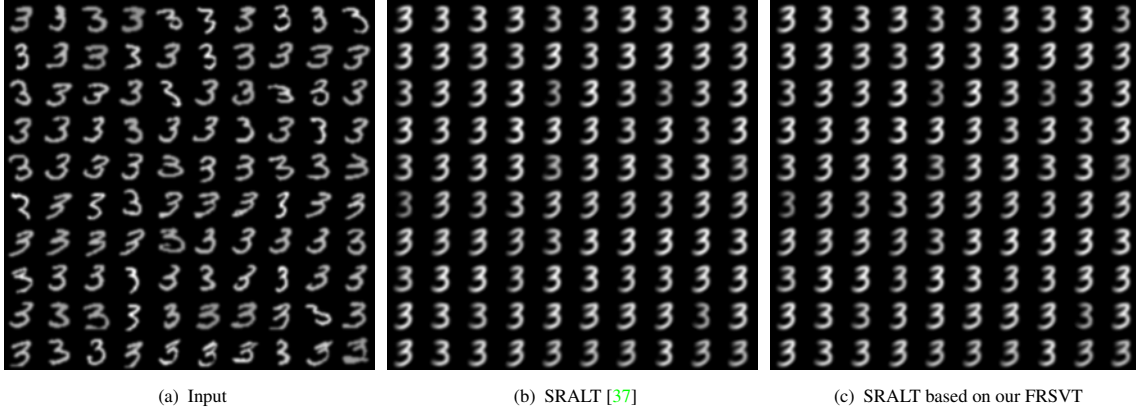

Figure 14. Simultaneously alignment and rectification comparisons on *Digits3* data [31].

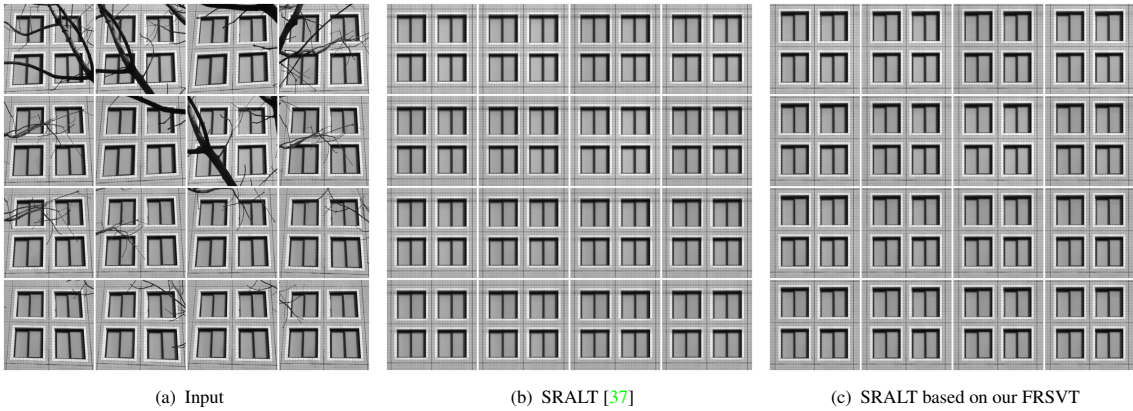

Figure 15. Simultaneously alignment and rectification comparisons on *Windows* data [31].



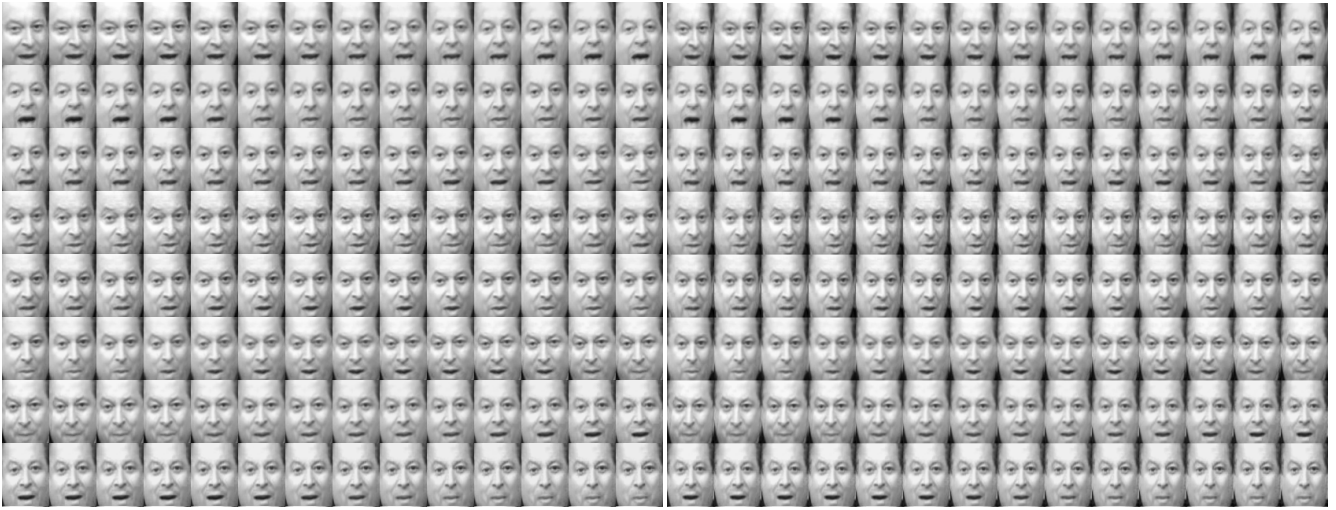

(a) RASL [31]

(b) SRALT [37] + Our FRSVT

Figure 16. Simultaneously alignment and rectification comparisons on *Al Gore* data [31].
